# Supplementary material for: Duck plague virus gE serves essential functions during the virion final envelopment through influence capsids budding into the cytoplasmic vesicles
Source: PubMed Central journal article supplement (PMC7101321; doi:10.1038/s41598-020-62604-9), 2020-03-27
Supplement: 41598_2020_62604_MOESM1_ESM.pdf [file 41598_2020_62604_MOESM1_ESM.pdf]

# Duck plague virus gE serves essential functions during the virion final envelopment through influence capsids budding into the cytoplasmic vesicles

Tian Liu<sup>1,2,3</sup>†, Mingshu Wang<sup>1,2,3</sup>†, Anchun Cheng<sup>1,2,3</sup>\*, Renyong Jia<sup>1,2,3</sup>, Qiao Yang<sup>1,2,3</sup>, Ying Wu<sup>1,2,3</sup>, Mafeng Liu<sup>1,2,3</sup>, Xinxin Zhao<sup>1,2,3</sup>, Shun Chen<sup>1,2,3</sup>, Shaqiu Zhang<sup>1,2,3</sup>, Dekang Zhu<sup>2,3</sup>, Bin Tian<sup>1,3</sup>, Mujeeb Ur Rehman<sup>1,3</sup>, Yunya Liu<sup>1,2,3</sup>, Yanling Yu<sup>1,2,3</sup>, Ling Zhang<sup>1,2,3</sup>, Leichang Pan<sup>1,3</sup>, and Xiaoyue Chen<sup>2,3</sup>

<sup>1</sup>Institute of Preventive Veterinary Medicine, Sichuan Agricultural University, Wenjiang 611130, People's Republic of China.

<sup>2</sup>Avian Disease Research Center, College of Veterinary Medicine of Sichuan Agricultural University, Wenjiang 611130, People's Republic of China.

<sup>3</sup>Key Laboratory of Animal Disease and Human Health of Sichuan Province, Sichuan Agricultural University, Wenjiang 611130, People's Republic of China.

\* Correspondence: chenganchun@vip.163.com

† These authors contributed equally to this work

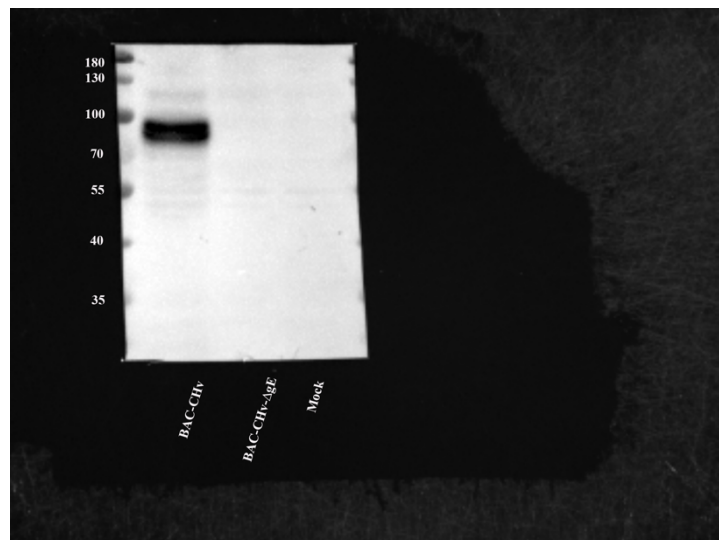

**Fig 2a:** Western blot analysis of gE protein expression of BAC-CHv and BAC-CHv-ΔgE.

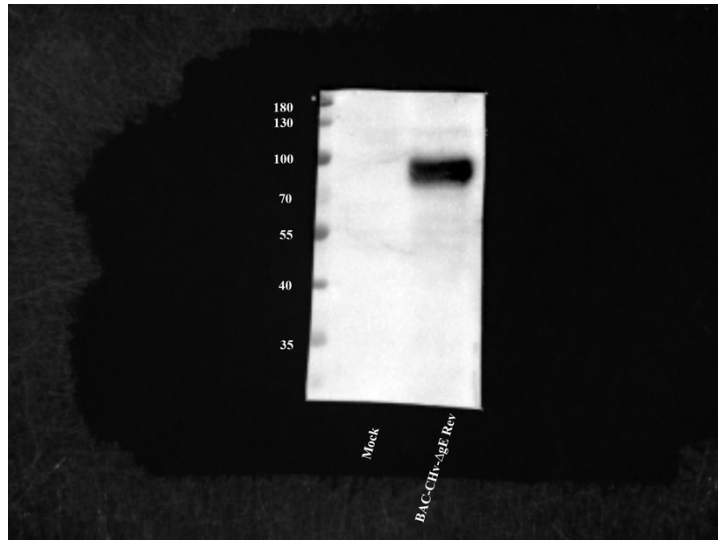

**Fig 2b:** Western blot analysis of gE protein expression of BAC-CHv-ΔgE Rev.
